# Supplementary material
Source: publisher figshare collection journal article supplement (https://acs.figshare.com/ndownloader/files/3875689)
Supplement: Supplementary file 1 [file 3875689]

## Supporting Information

Degradation Process of Lead Chromate in paintings by Vincent van Gogh studied by means of Spectromicroscopic methods. Part 5.

Effects of non-original surface coatings into the nature and distribution of chromium and sulfur species in chrome yellow paints.

*Letizia Monico,<sup>1,2,\*</sup> Koen Janssens,<sup>2</sup> Frederik Vanmeert,<sup>2</sup> Marine Cotte,<sup>3,4</sup> Brunetto Giovanni Brunetti,<sup>1</sup> Geert Van der Snickt,<sup>2</sup> Margje Leeuwestein,<sup>5</sup> Johanna Salvant Plisson,<sup>6</sup> Michel Menu,<sup>6,7</sup> Costanza Miliani.<sup>1</sup>*

<sup>1</sup> Institute of Molecular Science and Technologies (ISTM), National Research Council (CNR) and Centre SMAArt, c/o Department of Chemistry, Biology and Biotechnologies, University of Perugia, via Elce di Sotto 8, 06123 Perugia, Italy.

<sup>2</sup> Department of Chemistry, University of Antwerp, Groenenborgerlaan 171, 2020 Antwerp, Belgium.

<sup>3</sup> European Synchrotron Radiation Facility, Avenue des Martyrs 71, 38000 Grenoble, France.

<sup>4</sup> Laboratoire d'Archéologie Moléculaire et Structurale, CNRS-UPMC, UMR 8220, place Jussieu 4, 75005 Paris, France.

<sup>5</sup> Kröller-Müller Museum, Houtkampweg 6, 6731 AW Otterlo, The Netherlands.

<sup>6</sup> Centre de Recherche et de Restauration des Musées de France (C2RMF), Palais du Louvre, Quai François Mitterrand 14, 75001 Paris, France.

<sup>7</sup> Institut de Recherche de Chimie Paris, CNRS – Chimie ParisTech, UMR 8247, rue Pierre et Marie Curie 11, 75005 Paris, France.

\* Correspondence: [letizia.monico@uantwerpen.be](mailto:letizia.monico@uantwerpen.be)

## 1. EXPERIMENTAL SECTION

### 1.1. Sampling areas of resin-embedded original paint micro-samples

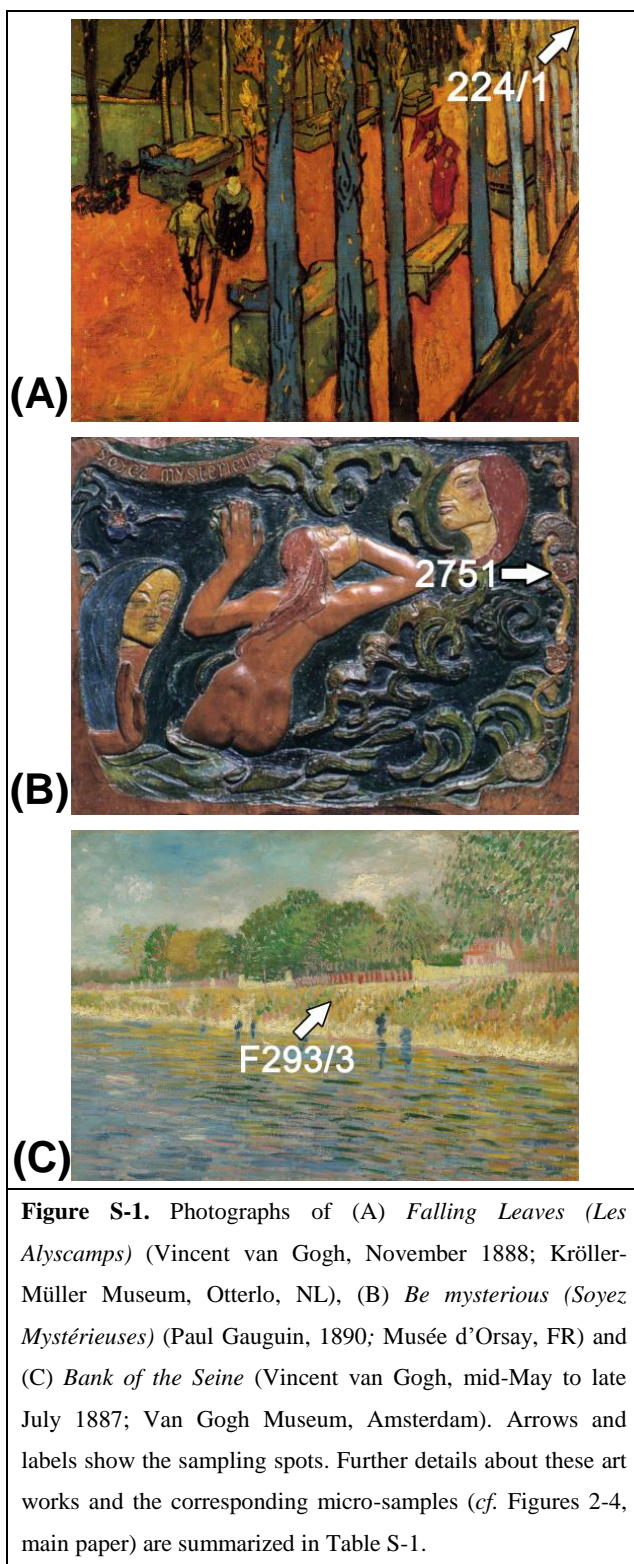

**Table S-1.** Details and characteristics of the original artworks and corresponding resin-embedded paint micro-samples investigated .

| <b>Painting name;<br/>corresponding<br/>sample number</b>                        | <b>Museum and<br/>inventory<br/>number</b>                         | <b>Creation date,<br/>technique and<br/>measurements</b>                             | <b>Notes on past treatments<sup>(a)</sup></b>                                                                                                                                                                                                                                                                                                                                 | <b>Chrome yellow composition<sup>1</sup></b>                                                   |
|----------------------------------------------------------------------------------|--------------------------------------------------------------------|--------------------------------------------------------------------------------------|-------------------------------------------------------------------------------------------------------------------------------------------------------------------------------------------------------------------------------------------------------------------------------------------------------------------------------------------------------------------------------|------------------------------------------------------------------------------------------------|
| <i>Falling Leaves (Les<br/>Alyscamps);</i><br>sample 224/1<br>(Vincent van Gogh) | Kröller-Müller<br>Museum<br>(Otterlo, NL)<br>Inv. n. KM<br>108.668 | November 1888;<br>oil on canvas;<br>72.8 x 91.9 cm <sup>2</sup>                      | The painting was lined, probably twice, certainly prior to 1919. The first lining was possibly a glue-paste lining; the most recent one was a wax-resin lining. Since the late 1980's cleaning tests have been performed to try to remove the oxidized and discolored varnish (application period unknown, possibly prior to 1919), which up till now have been unsuccessful. | monoclinic and possible orthorhombic PbCr <sub>1-x</sub> S <sub>x</sub> O <sub>4</sub> (x~0.5) |
| <i>Be Mysterious (Soyez<br/>Mystérieuses);</i><br>sample 2751<br>(Paul Gauguin)  | Musée d'Orsay<br>(Paris, FR)<br>Inv. n. RF 3405                    | 1890;<br>low relief,<br>polychrome lime<br>tree wood;<br>73 x 95 x 5 cm <sup>3</sup> | The surface of the artwork is covered with a thin wax layer, that was applied before 1979                                                                                                                                                                                                                                                                                     | monoclinic and possible orthorhombic PbCr <sub>1-x</sub> S <sub>x</sub> O <sub>4</sub> (x~0.5) |
| <i>Bank of the Seine;</i><br>sample F293/3<br>(Vincent van Gogh)                 | Van Gogh<br>Museum<br>(Amsterdam, NL)<br>Inv. n. S 77<br>V/1962    | mid-May to late<br>July 1887;<br>oil on linen;<br>32.0 x 46.0 cm <sup>2</sup>        | The painting was wax-resin lined and varnished by J. C. Traas sometime in the period 1927-1933. In 2005, the picture was cleaned and restored, <sup>(b)</sup> removing the deteriorated old varnish layer. No new surface coating was applied.                                                                                                                                | monoclinic<br>PbCr <sub>1-x</sub> S <sub>x</sub> O <sub>4</sub> (x~0.1)                        |

<sup>(a)</sup> Documentation from the conservation archives of the Kröller-Müller Museum, Van Gogh Museum, and Centre de Recherche et de Restauration des Musées de France.

<sup>(b)</sup> Restoration performed by Ella Hendriks (head-conservator of the Van Gogh Museum).

## 1.2. Methods

**1.2.1 Micro-Raman.** Analysis of the original paint micro-samples was carried out by means of a JASCO NRS-3100 double-grating spectrophotometer equipped with a charge coupled device (CCD) detector (cooled to -47 °C) and an optical microscope (100× objective). Investigations were performed using a 785.0 nm (diode laser) excitation wavelength while keeping the laser power at the sample between 5-8 mW. A 600 lines/mm<sup>-1</sup> grating was employed. Spectra were recorded in the energy range of 1940-235 cm<sup>-1</sup>; the exposure time varied between 5 and 10 s, with 10-20 accumulations. The spectral resolution was about 2 cm<sup>-1</sup>.

**1.2.2 Reflection mode micro-FTIR.** Original paint micro-samples were investigated using a JASCO Infrared Multichannel Viewer (IMV)-4000 (Cassegrain 16× objective), interfaced with a FTIR 4100 spectrometer. Spectra were acquired from areas of *ca.* 12.5×12.5 μm<sup>2</sup>, in the wavenumber range 6000-600 cm<sup>-1</sup>, at a resolution of 4 cm<sup>-1</sup> and by employing 3000 scans.

**1.2.3 Synchrotron μ-XANES and μ-XRF.** Original paint micro-samples and varnished oil paint models were analyzed at the X-ray microscope beam line ID21 of the European Synchrotron Radiation Facility (ESRF, Grenoble, France).<sup>2</sup>

In order to produce a highly monochromatic primary beam ( $\Delta E/E = 10^{-4}$ ), during the Cr and S K-edges analyses, a Si(220) or Si(111) fixed-exit double-crystal monochromator was used, respectively. At the S and Cr K-edge energies, the beam size was reduced down to 0.5×0.2 μm<sup>2</sup> and 0.75×0.2 μm<sup>2</sup> (hor. × ver.), respectively by means of Fresnel zone plates. The XRF signals were collected in the horizontal plane, at 69° with respect to the incident beam direction by using an energy-dispersive silicon drift diode detector (Bruker). The software PyMca<sup>3</sup> was employed to fit the XRF spectra in order to separate the different elemental contributions. A batch fitting procedure of the XRF profiles corresponding to each pixel of the 2D maps yielded elemental maps.

Fluorescence mode XANES spectra were acquired by scanning the primary energy around the Cr K-edge (5.96-6.09 keV) and the S K-edge (2.46-2.53 keV) with energy step sizes of 0.2 and 0.18 eV,

respectively. The position of the primary beam was maintained stable within 0.5  $\mu\text{m}$  vertical and 0.3  $\mu\text{m}$  horizontal. For all XANES spectra, the procedure of normalization was performed by means of the ATHENA package.<sup>4</sup> The same software was also used to carry out a linear combination fitting of the XANES spectra collected from the samples against a library of XANES profiles of Cr and S reference compounds. These were chosen on the basis of the knowledge gained from XRF and vibrational spectroscopic investigations.

Cr and S K-edge chemical state map distributions were obtained by following the procedure reported in the literature.<sup>5,6</sup>

## 2. RESULTS AND DISCUSSION

### 2.1. Cr and S K-edge XANES investigations of original paint micro-samples: quantitative estimation percentage of Cr and S species

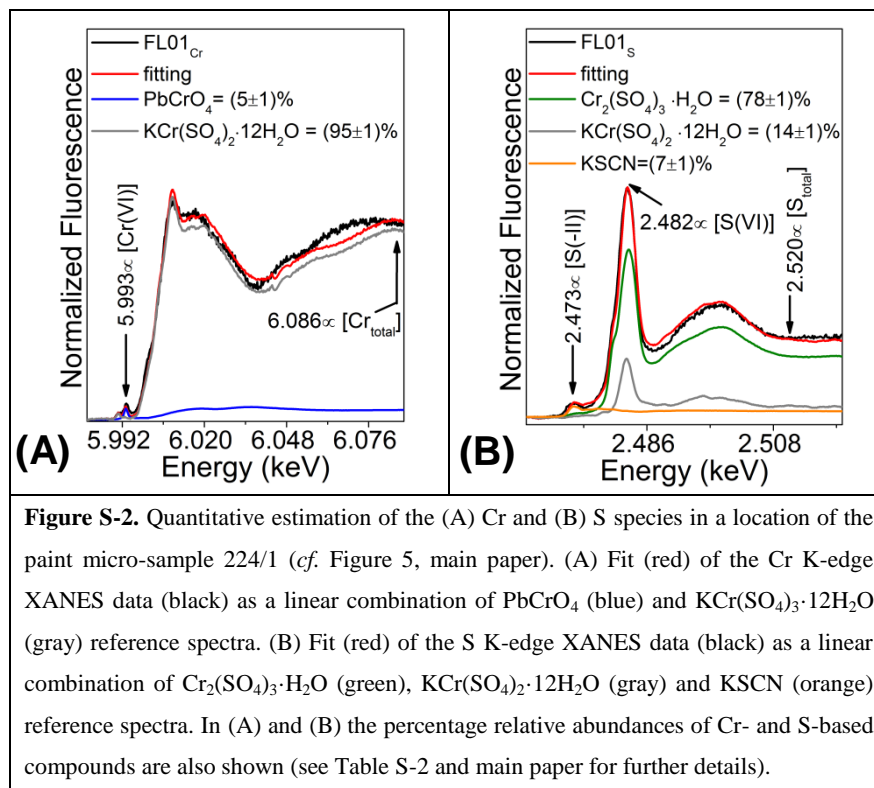

**Table S-2.** Quantitative estimation percentage of Cr and S species obtained by linear combination fitting of Cr and S K-edge XANES spectra collected from the original paint micro-samples.

| Sample                                                                                | Point analysis                      | Cr K-edge<br>weight percentage fitting components (%) |                                                                   |                                                        |                                                                                                                     |                                                                                   |                                      |                     |                                | S K-edge<br>weight percentage fitting components (%) |                                                                   |                                                        |                                                                     |                                      |                                                                                                                     |                                                                                                          |                                                                         |      |                               |      |
|---------------------------------------------------------------------------------------|-------------------------------------|-------------------------------------------------------|-------------------------------------------------------------------|--------------------------------------------------------|---------------------------------------------------------------------------------------------------------------------|-----------------------------------------------------------------------------------|--------------------------------------|---------------------|--------------------------------|------------------------------------------------------|-------------------------------------------------------------------|--------------------------------------------------------|---------------------------------------------------------------------|--------------------------------------|---------------------------------------------------------------------------------------------------------------------|----------------------------------------------------------------------------------------------------------|-------------------------------------------------------------------------|------|-------------------------------|------|
|                                                                                       |                                     | PbCrO <sub>4</sub> <sup>**</sup>                      | Cr <sub>2</sub> (SO <sub>4</sub> ) <sub>3</sub> ·H <sub>2</sub> O | KCr(SO <sub>4</sub> ) <sub>2</sub> ·12H <sub>2</sub> O | (NH <sub>4</sub> ) <sub>2</sub> SO <sub>4</sub> Cr <sub>2</sub> (SO <sub>4</sub> ) <sub>3</sub> ·24H <sub>2</sub> O | (CH <sub>3</sub> CO <sub>2</sub> ) <sub>7</sub> Cr <sub>3</sub> (OH) <sub>2</sub> | CrCl <sub>3</sub> ·6H <sub>2</sub> O | Cr(OH) <sub>3</sub> | Cr <sub>2</sub> O <sub>3</sub> | [Cr(III)]/[Cr <sub>total</sub> ]                     | Cr <sub>2</sub> (SO <sub>4</sub> ) <sub>3</sub> ·H <sub>2</sub> O | KCr(SO <sub>4</sub> ) <sub>2</sub> ·12H <sub>2</sub> O | Al <sub>2</sub> (SO <sub>4</sub> ) <sub>3</sub> ·17H <sub>2</sub> O | CaSO <sub>4</sub> ·2H <sub>2</sub> O | (NH <sub>4</sub> ) <sub>2</sub> SO <sub>4</sub> Cr <sub>2</sub> (SO <sub>4</sub> ) <sub>3</sub> ·24H <sub>2</sub> O | (Na,K)Ca <sub>2</sub> Al <sub>6</sub> Si <sub>6</sub> O <sub>24</sub> (SO <sub>4</sub> ) <sub>~1.5</sub> | PbCr <sub>0.4</sub> S <sub>0.6</sub> O <sub>4</sub> / PbSO <sub>4</sub> | KSCN | [S(VI)]/[S <sub>total</sub> ] |      |
| 224/1<br>(cf. Figure 5, main paper)                                                   | FL01 <sub>Cr/S</sub>                | 5±1                                                   | -                                                                 | 95±1                                                   | -                                                                                                                   | -                                                                                 | -                                    | -                   | -                              | 95±1                                                 | 78±1                                                              | 14±1                                                   | -                                                                   | -                                    | -                                                                                                                   | -                                                                                                        | -                                                                       | 7±1  | 92±1                          |      |
|                                                                                       | FL02 <sub>Cr/S</sub>                | 3±1                                                   | -                                                                 | 95±1                                                   | -                                                                                                                   | -                                                                                 | -                                    | -                   | -                              | 96±6                                                 | 52±4                                                              | 27±2                                                   | -                                                                   | -                                    | -                                                                                                                   | -                                                                                                        | -                                                                       | 17±6 | 79±4                          |      |
|                                                                                       |                                     | 5±4                                                   | 93±4                                                              | -                                                      | -                                                                                                                   | -                                                                                 | -                                    | -                   | -                              |                                                      | -                                                                 | -                                                      | -                                                                   | -                                    | -                                                                                                                   | -                                                                                                        | -                                                                       | -    | -                             |      |
|                                                                                       | FL03 <sub>Cr/S</sub>                | 11±1                                                  | -                                                                 | 88±1                                                   | -                                                                                                                   | -                                                                                 | -                                    | -                   | -                              | 88±1                                                 | 57±5                                                              | 26±3                                                   | -                                                                   | -                                    | -                                                                                                                   | -                                                                                                        | -                                                                       | 17±6 | 83±6                          |      |
|                                                                                       | FL04 <sub>Cr/S</sub>                | 15±3                                                  | -                                                                 | 85±3                                                   | -                                                                                                                   | -                                                                                 | -                                    | -                   | -                              | 85±4                                                 | 58±2                                                              | 24±2                                                   | -                                                                   | -                                    | -                                                                                                                   | -                                                                                                        | -                                                                       | 14±1 | 82±3                          |      |
|                                                                                       | FL05 <sub>Cr/S</sub> <sup>(a)</sup> | 27±1                                                  | -                                                                 | 74±1                                                   | -                                                                                                                   | -                                                                                 | -                                    | -                   | -                              | 72±1                                                 | -                                                                 | -                                                      | 35±1                                                                | -                                    | -                                                                                                                   | -                                                                                                        | -                                                                       | 35±1 | 35±1                          |      |
|                                                                                       |                                     | 31±1                                                  | 71±1                                                              | -                                                      | -                                                                                                                   | -                                                                                 | -                                    | -                   | -                              |                                                      | -                                                                 | -                                                      | -                                                                   | -                                    | -                                                                                                                   | -                                                                                                        | -                                                                       | -    | -                             |      |
|                                                                                       | FL06 <sub>Cr/S</sub>                | 69±1                                                  | -                                                                 | -                                                      | -                                                                                                                   | -                                                                                 | -                                    | -                   | 31±1                           | -                                                    | 30±1                                                              | -                                                      | -                                                                   | -                                    | -                                                                                                                   | -                                                                                                        | -                                                                       | -    | -                             |      |
| 71±1                                                                                  |                                     | -                                                     | -                                                                 | -                                                      | -                                                                                                                   | -                                                                                 | -                                    | 29±1                | -                              | -                                                    |                                                                   | -                                                      | -                                                                   | -                                    | -                                                                                                                   | -                                                                                                        | -                                                                       | -    |                               |      |
| FL07 <sub>Cr/S</sub>                                                                  | -                                   | -                                                     | -                                                                 | -                                                      | -                                                                                                                   | -                                                                                 | -                                    | 100                 | -                              | 100                                                  | -                                                                 | -                                                      | -                                                                   | -                                    | -                                                                                                                   | -                                                                                                        | -                                                                       | -    |                               |      |
| Yellow <sub>Cr/S</sub> <sup>(b)</sup>                                                 | 100                                 | -                                                     | -                                                                 | -                                                      | -                                                                                                                   | -                                                                                 | -                                    | -                   | -                              | 0                                                    | -                                                                 | -                                                      | -                                                                   | -                                    | -                                                                                                                   | -                                                                                                        | 90±1                                                                    | -    | 90±1                          |      |
| 2751<br>(cf. Figure 6, main paper)                                                    | G01 <sub>Cr/S</sub>                 | 5±1                                                   | -                                                                 | 67±4                                                   | -                                                                                                                   | -                                                                                 | -                                    | -                   | 28±1                           | -                                                    | 95±4                                                              | -                                                      | -                                                                   | -                                    | 22±3                                                                                                                | 58±5                                                                                                     | -                                                                       | -    | 23±5                          | 80±6 |
|                                                                                       | G02 <sub>Cr/</sub>                  | -                                                     | -                                                                 | -                                                      | -                                                                                                                   | -                                                                                 | -                                    | -                   | 100                            | -                                                    | 100                                                               | -                                                      | -                                                                   | -                                    | -                                                                                                                   | -                                                                                                        | -                                                                       | -    | -                             |      |
|                                                                                       | G03 <sub>Cr</sub>                   | 52±1                                                  | -                                                                 | -                                                      | 45±3                                                                                                                | -                                                                                 | -                                    | -                   | -                              | 43±3                                                 | -                                                                 | -                                                      | -                                                                   | -                                    | -                                                                                                                   | -                                                                                                        | -                                                                       | -    | -                             |      |
|                                                                                       |                                     | 57±1                                                  | -                                                                 | 40±3                                                   | -                                                                                                                   | -                                                                                 | -                                    | -                   | -                              |                                                      | -                                                                 | -                                                      | -                                                                   | -                                    | -                                                                                                                   | -                                                                                                        | -                                                                       | -    | -                             |      |
|                                                                                       |                                     | 52±1                                                  | 45±3                                                              | -                                                      | -                                                                                                                   | -                                                                                 | -                                    | -                   | -                              |                                                      | -                                                                 | -                                                      | -                                                                   | -                                    | -                                                                                                                   | -                                                                                                        | -                                                                       | -    | -                             |      |
|                                                                                       | G04 <sub>Cr</sub>                   | 72±1                                                  | -                                                                 | 28±1                                                   | -                                                                                                                   | -                                                                                 | -                                    | -                   | -                              | 29±1                                                 | -                                                                 | -                                                      | -                                                                   | -                                    | -                                                                                                                   | -                                                                                                        | -                                                                       | -    | -                             |      |
|                                                                                       |                                     | 70±1                                                  | -                                                                 | -                                                      | 29±1                                                                                                                | -                                                                                 | -                                    | -                   | -                              |                                                      | -                                                                 | -                                                      | -                                                                   | -                                    | -                                                                                                                   | -                                                                                                        | -                                                                       | -    | -                             |      |
|                                                                                       |                                     | 69±1                                                  | 30±1                                                              | -                                                      | -                                                                                                                   | -                                                                                 | -                                    | -                   | -                              |                                                      | -                                                                 | -                                                      | -                                                                   | -                                    | -                                                                                                                   | -                                                                                                        | -                                                                       | -    | -                             |      |
|                                                                                       | G05 <sub>S</sub>                    | -                                                     | -                                                                 | -                                                      | -                                                                                                                   | -                                                                                 | -                                    | -                   | -                              | -                                                    | -                                                                 | -                                                      | -                                                                   | 32±1                                 | -                                                                                                                   | 26±3                                                                                                     | -                                                                       | 38±1 | 58±3                          |      |
|                                                                                       | G06 <sub>S</sub>                    | -                                                     | -                                                                 | -                                                      | -                                                                                                                   | -                                                                                 | -                                    | -                   | -                              | -                                                    | -                                                                 | -                                                      | -                                                                   | 45±5                                 | -                                                                                                                   | 25±5                                                                                                     | -                                                                       | 24±2 | 70±7                          |      |
| G07 <sub>S</sub>                                                                      | -                                   | -                                                     | -                                                                 | -                                                      | -                                                                                                                   | -                                                                                 | -                                    | -                   | -                              | *                                                    |                                                                   |                                                        |                                                                     |                                      |                                                                                                                     |                                                                                                          |                                                                         |      |                               |      |
| F293/3 <sup>§</sup><br>(cf. Figure 6 of Part 2 <sup>7</sup> and Figure 4, main paper) | 01                                  | 80±4                                                  | -                                                                 | -                                                      | -                                                                                                                   | -                                                                                 | 20±4                                 | -                   | -                              | 20±4                                                 | -                                                                 | -                                                      | -                                                                   | -                                    | -                                                                                                                   | -                                                                                                        | -                                                                       | -    | -                             |      |
|                                                                                       | 02 <sup>†</sup>                     | 85±1                                                  | -                                                                 | -                                                      | 15±1                                                                                                                | -                                                                                 | -                                    | -                   | -                              | 15±1                                                 | -                                                                 | -                                                      | -                                                                   | -                                    | -                                                                                                                   | -                                                                                                        | -                                                                       | -    | -                             |      |
|                                                                                       | 03                                  | 8±3                                                   | -                                                                 | -                                                      | -                                                                                                                   | 48±3                                                                              | -                                    | -                   | 44±3                           | 91±4                                                 | -                                                                 | -                                                      | -                                                                   | -                                    | -                                                                                                                   | -                                                                                                        | -                                                                       | -    | -                             |      |
|                                                                                       |                                     | 10±3                                                  | -                                                                 | -                                                      | -                                                                                                                   | -                                                                                 | 45±2                                 | 44±3                | -                              |                                                      | -                                                                 | -                                                      | -                                                                   | -                                    | -                                                                                                                   | -                                                                                                        | -                                                                       | -    | -                             |      |
|                                                                                       |                                     | 8±3                                                   | -                                                                 | -                                                      | -                                                                                                                   | 50±2                                                                              | -                                    | 41±2                | -                              |                                                      | -                                                                 | -                                                      | -                                                                   | -                                    | -                                                                                                                   | -                                                                                                        | -                                                                       | -    | -                             |      |
|                                                                                       | 04                                  | 70±1                                                  | -                                                                 | -                                                      | -                                                                                                                   | -                                                                                 | -                                    | -                   | 30±1                           | 30±1                                                 | -                                                                 | -                                                      | -                                                                   | -                                    | -                                                                                                                   | -                                                                                                        | -                                                                       | -    | -                             |      |
|                                                                                       |                                     | 70±1                                                  | -                                                                 | -                                                      | -                                                                                                                   | -                                                                                 | -                                    | 30±1                | -                              |                                                      | -                                                                 | -                                                      | -                                                                   | -                                    | -                                                                                                                   | -                                                                                                        | -                                                                       | -    | -                             |      |
|                                                                                       | 05                                  | 48±2                                                  | -                                                                 | -                                                      | 52±2                                                                                                                | -                                                                                 | -                                    | -                   | -                              | 52±2                                                 | -                                                                 | -                                                      | -                                                                   | -                                    | -                                                                                                                   | -                                                                                                        | -                                                                       | -    | -                             |      |
|                                                                                       | 06                                  | 70±1                                                  | -                                                                 | -                                                      | 30±1                                                                                                                | -                                                                                 | -                                    | -                   | -                              | 30±1                                                 | -                                                                 | -                                                      | -                                                                   | -                                    | -                                                                                                                   | -                                                                                                        | -                                                                       | -    | -                             |      |
|                                                                                       |                                     | 70±1                                                  | 30±1                                                              | -                                                      | -                                                                                                                   | -                                                                                 | -                                    | -                   | -                              |                                                      | -                                                                 | -                                                      | -                                                                   | -                                    | -                                                                                                                   | -                                                                                                        | -                                                                       | -    | -                             |      |
|                                                                                       | 07                                  | 12±2                                                  | -                                                                 | -                                                      | -                                                                                                                   | 88±2                                                                              | -                                    | -                   | -                              | 88±2                                                 | -                                                                 | -                                                      | -                                                                   | -                                    | -                                                                                                                   | -                                                                                                        | -                                                                       | -    | -                             |      |
|                                                                                       | BS01 <sub>S</sub> <sup>(c)</sup>    | -                                                     | -                                                                 | -                                                      | -                                                                                                                   | -                                                                                 | -                                    | -                   | -                              | -                                                    | -                                                                 | -                                                      | -                                                                   | -                                    | -                                                                                                                   | -                                                                                                        | 87±2                                                                    | -    | 87±2                          |      |
|                                                                                       | BS02 <sub>S</sub>                   | -                                                     | -                                                                 | -                                                      | -                                                                                                                   | -                                                                                 | -                                    | -                   | -                              | -                                                    | -                                                                 | -                                                      | 41±2                                                                | 30±2                                 | -                                                                                                                   | -                                                                                                        | -                                                                       | 23±1 | 71±3                          |      |
| BS03 <sub>S</sub>                                                                     | -                                   | -                                                     | -                                                                 | -                                                      | -                                                                                                                   | -                                                                                 | -                                    | -                   | -                              | -                                                    | -                                                                 | -                                                      | -                                                                   | -                                    | -                                                                                                                   | ~100                                                                                                     | -                                                                       | 100  |                               |      |
| BS04 <sub>S</sub>                                                                     | -                                   | -                                                     | -                                                                 | -                                                      | -                                                                                                                   | -                                                                                 | -                                    | -                   | -                              | -                                                    | -                                                                 | -                                                      | -                                                                   | 41±2                                 | -                                                                                                                   | -                                                                                                        | 36±2                                                                    | 28±1 | 77±3                          |      |

Best fitting results of the S K-edge XANES spectrum including as third component also: <sup>(a)</sup> Na<sub>2</sub>S<sub>4</sub>O<sub>6</sub>·2H<sub>2</sub>O=(26±3)%;<sup>(b)</sup> Na<sub>2</sub>SO<sub>3</sub>=(10±1)%;<sup>(c)</sup> Na<sub>2</sub>SO<sub>3</sub>=(12±2)%.

<sup>†</sup> Due to the similar spectral features of different PbCr<sub>1-x</sub>S<sub>x</sub>O<sub>4</sub> (0≤x≤0.8) reference compounds (cf. Figure 7C-E, main paper), similar fit results were obtained.

\* no good description of the XANES spectrum by linear combination fit. However the profile resembles to that of BaSO<sub>4</sub> (cf. Figure 6D, main paper)

<sup>§</sup> Figure 6 of Part 2<sup>7</sup> to see the Cr K-edge XANES spectra. For this sample Cr and S K-edge XANES profiles were not collected in the same locations.

<sup>†</sup> Comparable and good fitting results were obtained regardless of the Cr(III) reference compound used in the model.





## REFERENCES

---

- (1) Monico, L.; Janssens, K.; Miliani, C.; Brunetti, B. G.; Vagnini, M.; Vanmeert, F.; Falkenberg, G.; Abakumov, A.; Lu, Y.; Tian, H.; Verbeeck, J.; Radepont, M.; Cotte, M.; Hendriks, E.; Geldof, M.; van der Loeff, L.; Salvant, J.; Menu, M. *Anal. Chem.* **2013**, 85, 851-859.
- (2) Salomé, M.; Cotte, M.; Baker, R.; Barrett, R.; Benseny-Cases, N.; Berruyer, G.; Bugnazet, D.; Castillo-Michel, H.; Cornu, C.; Fayard, B.; Gagliardini, E.; Hino, R.; Morse, J.; Papillon, E.; Pouyet, E.; Rivard, C.; Solé, V. A.; Susini, J.; Veronesi, G. *J. Phys.: Conf. Ser.* **2013**, 425, 182004.
- (3) Solé, V. A.; Papillon, E.; Cotte, M.; Walter, P.; Susini, J. *Spectrochim. Acta B* **2007**, 62, 63–68.
- (4) Ravel, B.; Newville, M. *J. Synchrotron Radiat.* **2005**, 12, 537–541.
- (5) Monico, L.; Van der Snickt, G.; Janssens, K.; De Nolf, W.; Miliani, C.; Verbeeck, J.; Tian, H.; Tan, H.; Dik, J.; Radepont, M.; Cotte, M. *Anal. Chem.* **2011**, 83, 1214-1223.
- (6) Cotte, M.; Susini, J.; Metrich, N.; Moscato, A.; Gratziau, C.; Bertagnini, A.; Pagano, M. *Anal. Chem.* **2006**, 78, 7484-7492.
- (7) Monico, L.; Van der Snickt, G.; Janssens, K.; De Nolf, W.; Miliani, C.; Dik, J.; Radepont, M.; Hendriks, E.; Geldof, M.; Cotte, M. *Anal. Chem.* **2011**, 83, 1224-1231.
